# Supplementary material
Source: PubMed Central journal article supplement (PMC3613909)
Supplement: JCI65048sd.pdf [file JCI65048sd.pdf]

**Supplemental information**

**Tcf7/ $\beta$ -catenin-Sox2-Nestin cascade determines tumorigenicity and  
function of ESC-derived retinal progenitors**

Lu Cui, Yuan Guan, Zepeng Qu, Jingfa Zhang, Bing Liao, Bo Ma, Jiang Qian,

Dangsheng Li, Weiye Li, Guo-Tong Xu & Ying Jin

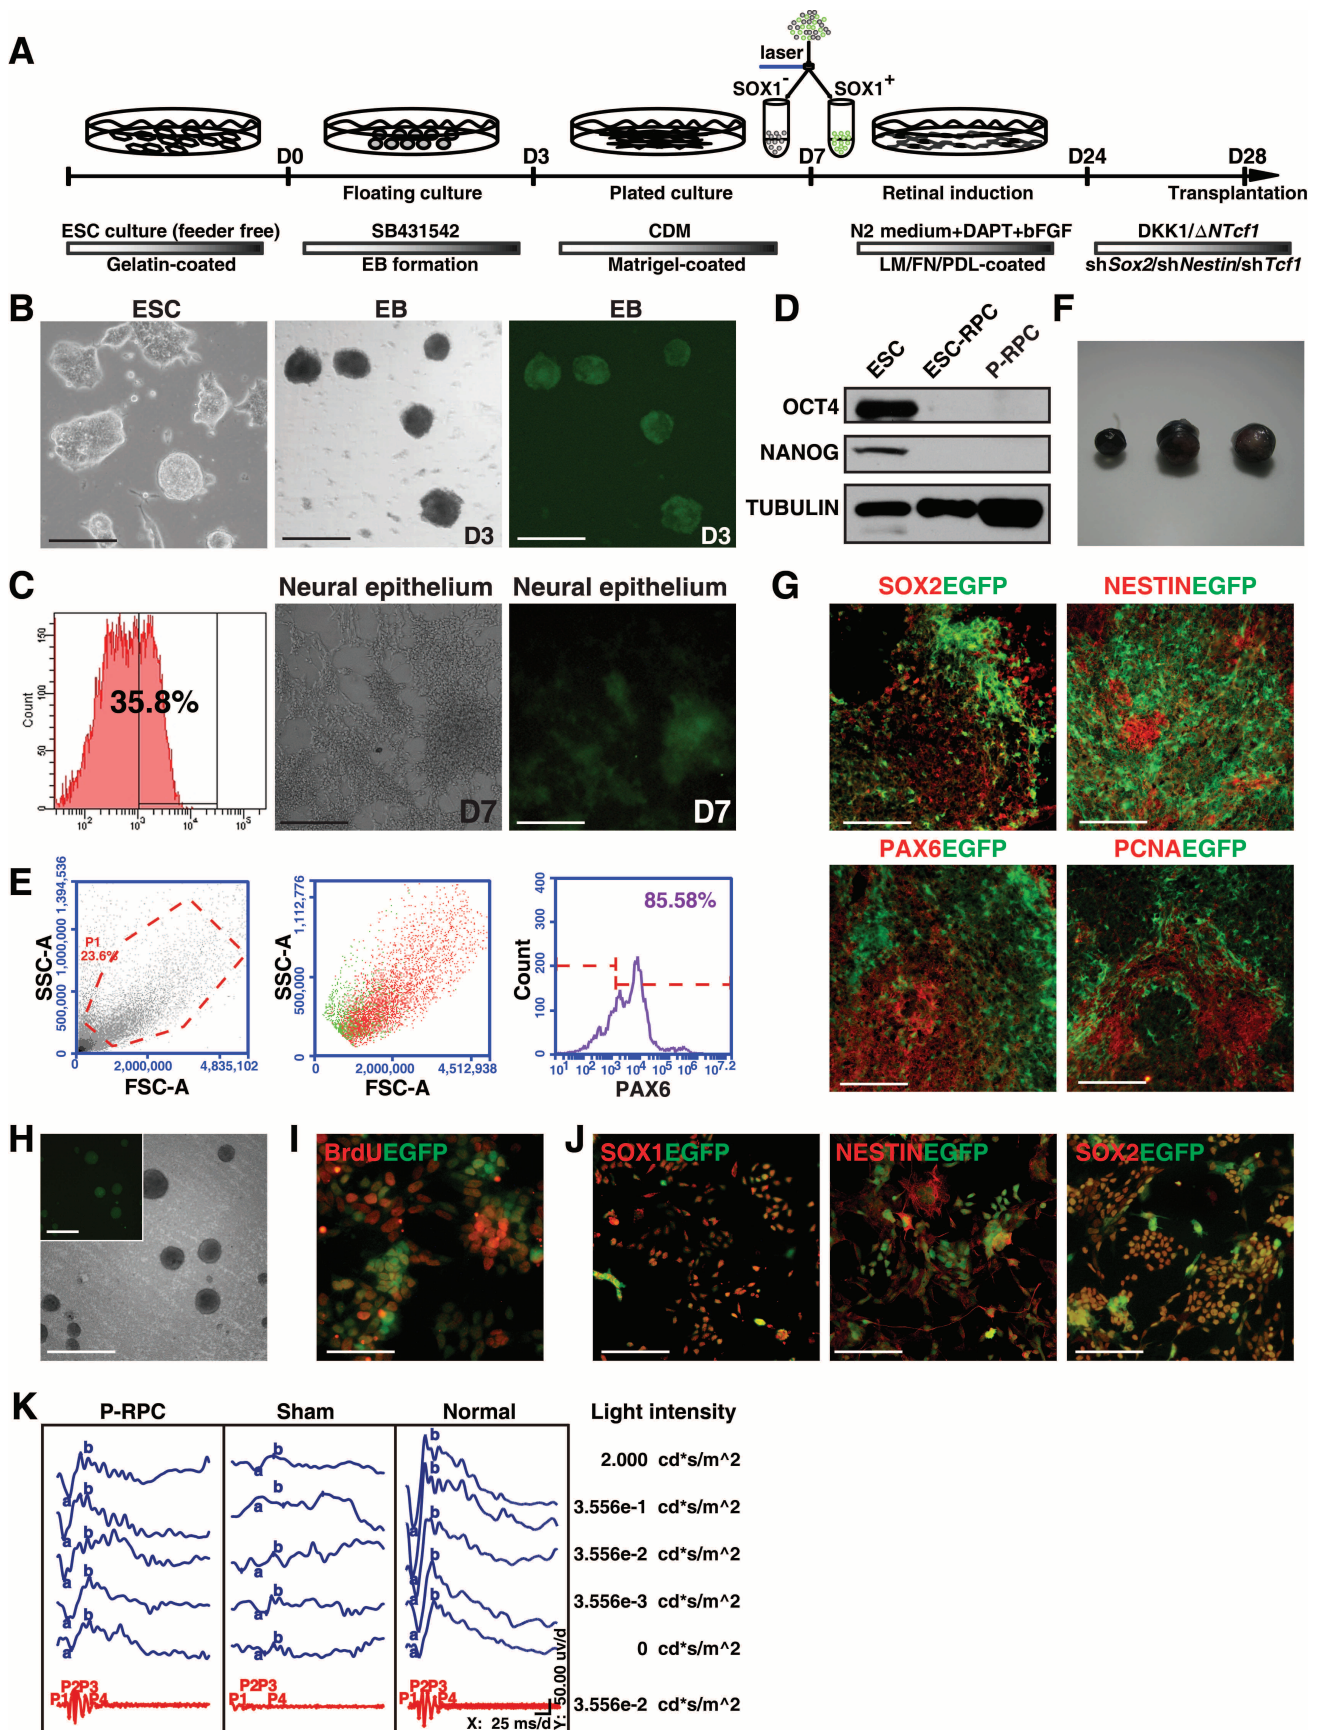

**Supplemental Figure 1**

Differentiation of ESCs into RPCs via a FACS selection process and further lineage-restricted induction. (A) The schematic diagram of the multi-step differentiation of mouse ESCs (46C) into RPCs. (B) The bright field image of mouse ESCs and embryonic bodies (EBs) 3 days after differentiation (D3). The fluorescence image of EGFP<sup>+</sup> neural subsets in EBs is also shown. (C) Purification of the SOX1.EGFP<sup>+</sup> neural epithelium by FACS from ESC derivatives at day 7 (D7) of neural differentiation in the SFEB/CDM. (D) Western blots determining endogenous expression of OCT4 and NANOG protein levels. TUBULIN serves as a loading control. (E) Representative gating strategy of FCM analysis and histogram showing 85.58% PAX6<sup>+</sup> cells (red). (F) Comparison of the size of eyeballs between a normal eye (left) and ESC-RPC engrafted eyes (two at the right). (G) Immunofluorescence staining for sections of eye tumors. (H) EGFP<sup>+</sup> cells were isolated from the ESC-RPCs<sup>EGFP</sup> derived tumors by FACS and neurosphere formation assays were conducted by the suspension culture. (I) The BrdU incorporation assay for isolated EGFP<sup>+</sup> tumor cells. (J) Immunofluorescence staining of isolated EGFP<sup>+</sup> cells from eye tumors for SOX1, NESTIN and SOX2 (red), respectively. (K) Representative scotopic ERG responses (blue lines) and OPs responses (red lines) in transplanted and control eyes. The stimulus flash intensities used to activate photoreceptors are indicated along the right side. The calibration on the right indicates 50  $\mu$ V/d vertically and 25 ms/d horizontally. Scale bars, 100  $\mu$ m (B-C, G-H, J); 50  $\mu$ m (I).

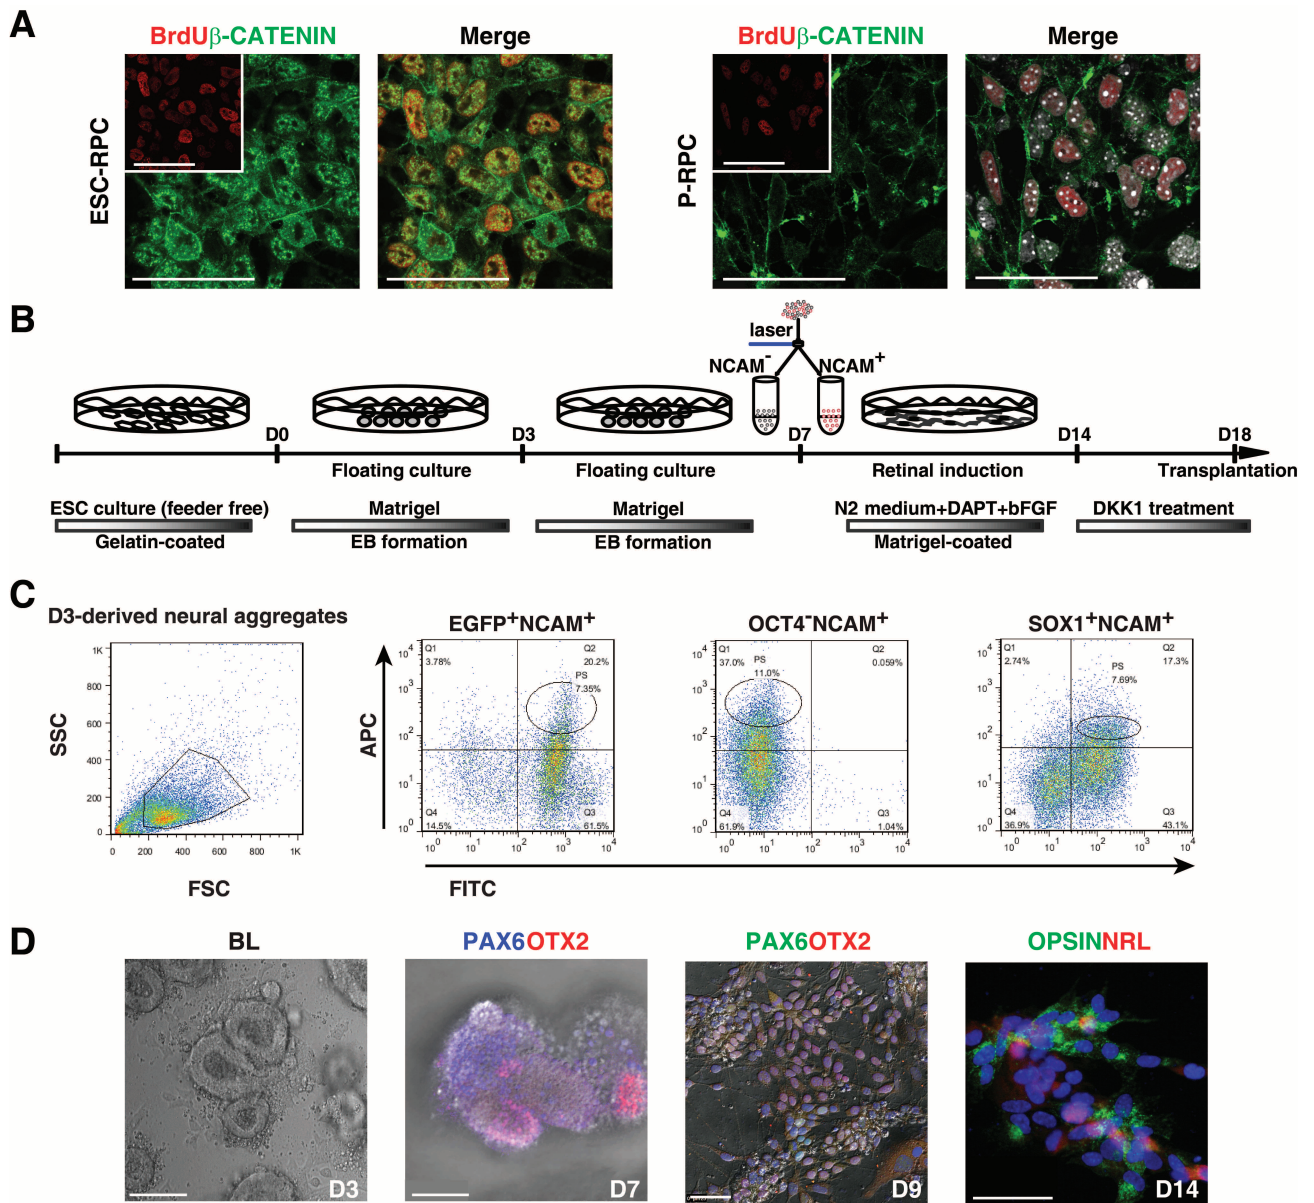

**Supplemental Figure 2**

The activation of canonical WNT signaling exists in the different ESC line derived RPCs. (A) The confocal image of immunofluorescence staining for  $\beta$ -CATENIN proteins and incorporated BrdU in ESC-RPCs and P-RPCs. DAPI is set as a grey color. Scale bars, 50  $\mu$ m. (B) The Schematic diagram of the SFEB/Matrigel method for the differentiation of additional lines of ESCs into RPCs. (C) Representative enrichment strategy of FCM plot in D3<sup>EGFP</sup>, ESC<sup>Oct4.EGFP</sup> and ESC<sup>Sox1.EGFP</sup> derived aggregates. (D) The bright field image and immunostaining of the ESC<sup>Oct4.EGFP</sup> derived cells at different differentiation stages. Scale bars, 50  $\mu$ m.



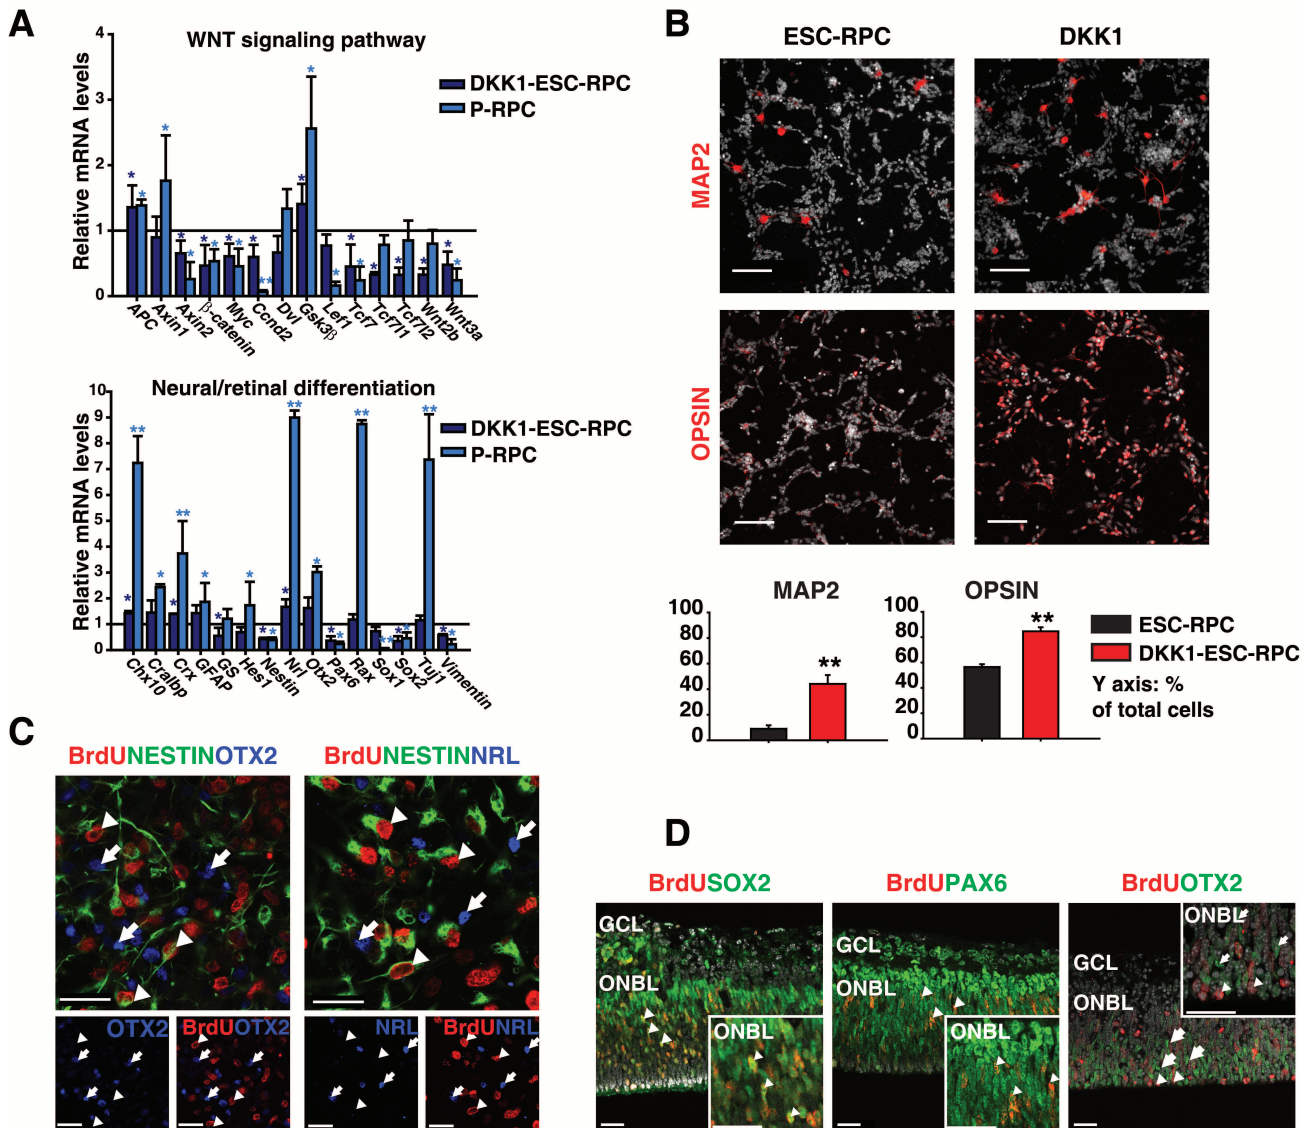

### Supplemental Figure 3

Inhibition of canonical WNT signaling promotes differentiation of ESC-RPCs into more mature retinal cells. (A) Relative gene expression levels in P-RPCs and DKK1 treated ESC-RPCs were determined by qRT-PCR and compared to those in untreated ESC-RPCs, which were set at 1.0. Mean  $\pm$  SD; analysis of variance (ANOVA); \*  $P < 0.05$ . (B) DKK1 treatment up-regulates the percentage of cells expressing MAP2 or OPSIN. DAPI is set as a grey color. Scale bars, 50  $\mu$ m. Bar charts are the quantitative analysis of the corresponding staining. Mean  $\pm$  SD;  $t$  test; \*\*  $P < 0.01$ . (C) Representative images of coimmunostaining of BrdU and NESTIN with OTX2 or BrdU and NESTIN with NRL in DKK1-ESC-RPCs. Arrowheads indicate BrdU<sup>+</sup>/NESTIN<sup>+</sup> cells; arrows indicate post-mitotic OTX2<sup>+</sup> or NRL<sup>+</sup> cells. Scale bars, 25  $\mu$ m. (D) Representative images of immunostaining of BrdU with SOX2 or PAX6 or OTX2 in the neonatal mice retina. Arrowheads indicate proliferating cells; arrows indicate post-mitotic cells. Scale bars, 25  $\mu$ m. ONBL: outer neuroblastic layer.



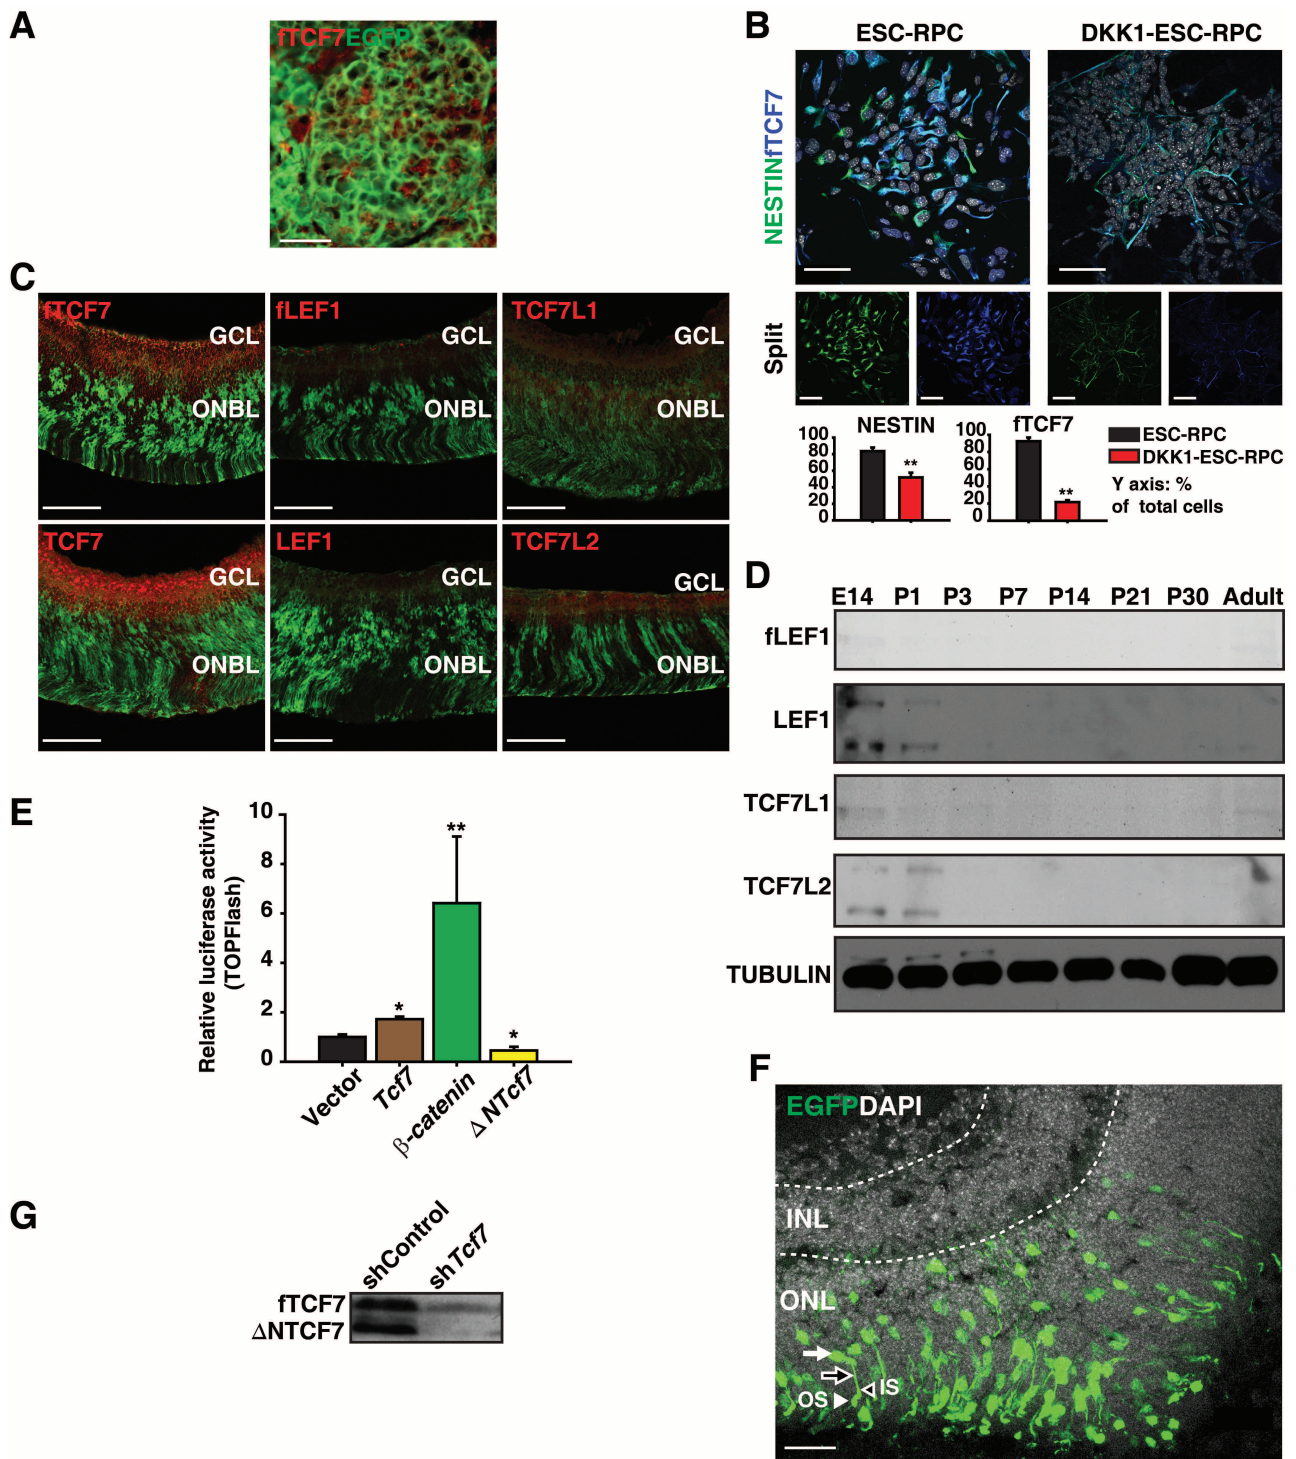

#### Supplemental Figure 4

TCF7 plays a key role in early retinal development and ESC-RPCs. (A) The expression of fTCF7 in ESC-RPC<sup>EGFP</sup> derived tumors was analyzed by immunofluorescence staining. (B) Immunofluorescence staining shows the effect of DKK1 on the percentages of NESTIN<sup>+</sup> or fTCF7<sup>+</sup> ESC-RPCs. DAPI is set as grey color. Bar charts are the quantitative analysis of the corresponding staining. (C) Representative images of immunofluorescence staining for the expression pattern of TCF/LEF factors in the retina of a *Nestin.EGFP* transgenic mouse at P1. (D) Representative western blot for the expression of TCF/LEF factors except TCF7 proteins in mouse retina from E14d to the adult. (E) TOPFlash assays were performed to measure the activity of TCF7 in HEK293 cells, stimulated with the WNT3A-containing medium for 6 hours. (F) A typical image for injected  $\Delta$ NTcf7-ESC-RPCs to integrate into the recipient retina three weeks after transplantation is illustrated. An integrated donor cell having the rod cell morphology is indicated (the filled arrow for the nucleus; the open arrow for the outer process; the open arrowhead for the IS; the filled arrowhead for the OS). ONBL: outer neuroblastic layer. (G) The validation of the silencing of *Tcf7* expression in ESC-RPCs was made by the western blot analysis. Data are shown as Mean  $\pm$  SD; *t* test (B); ANOVA (E); \* *P* < 0.05; \*\* *P* < 0.01. Scale bars, 50  $\mu$ m (A, B), 100  $\mu$ m (C), 25  $\mu$ m (F).

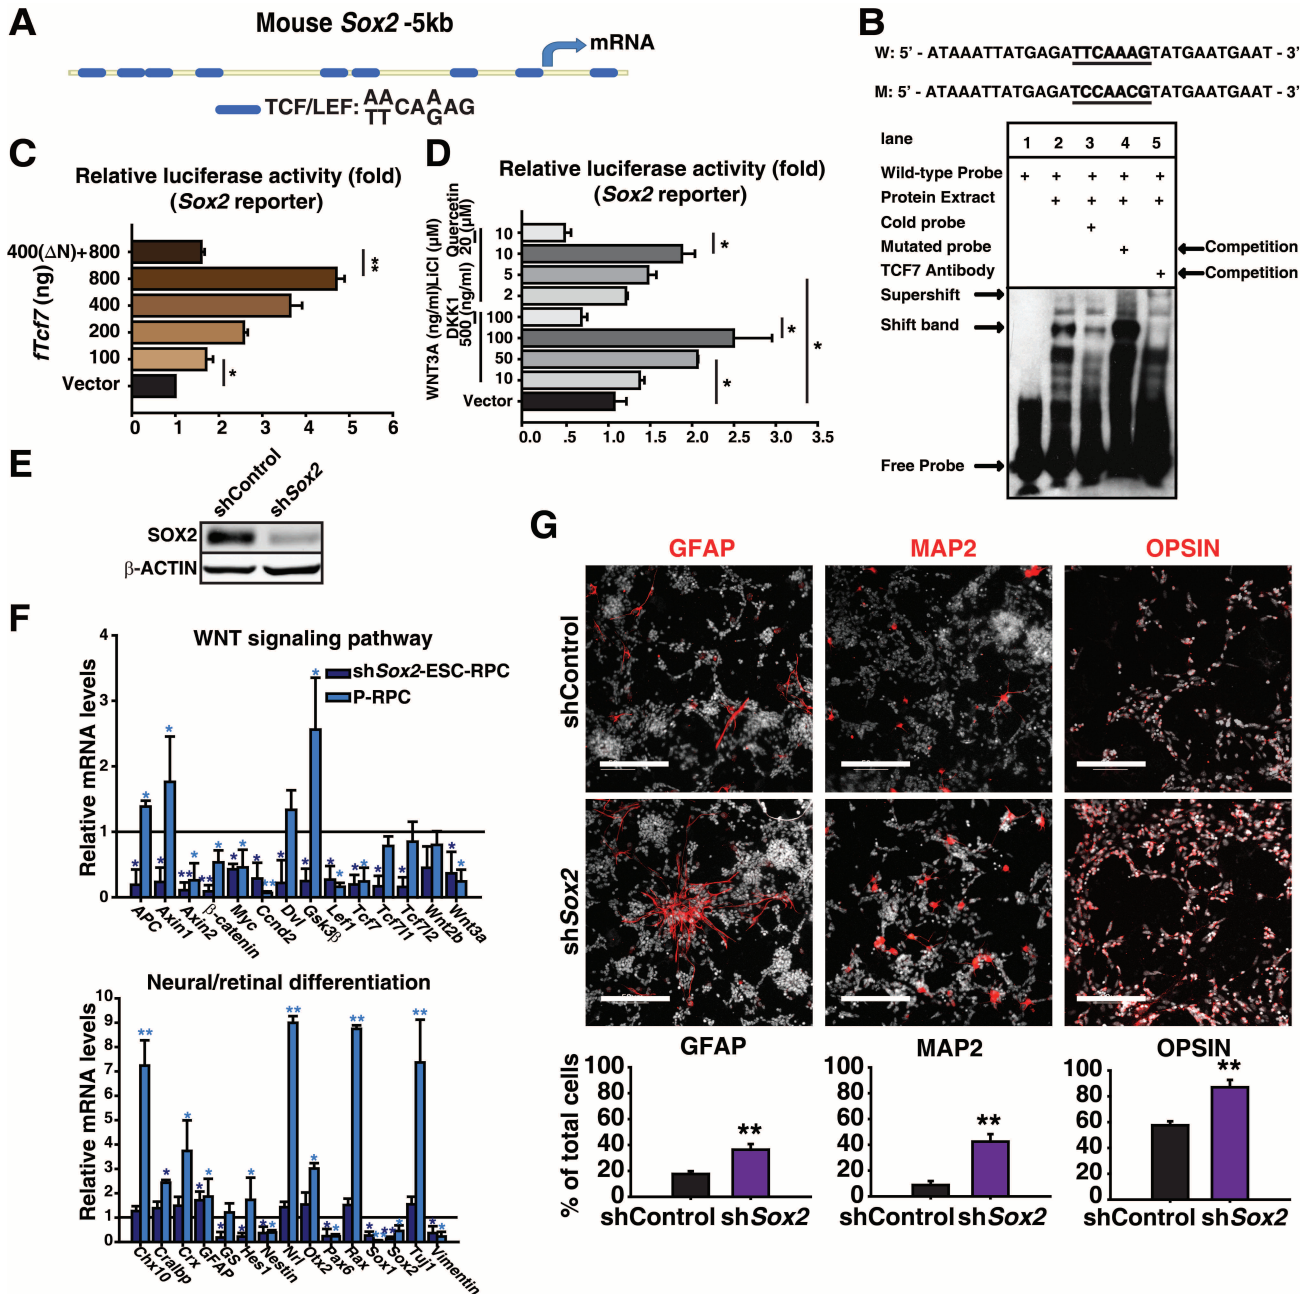

### Supplemental Figure 5

The expression of *Sox2* are directly regulated by TCF7 and involved in determining the fate of ESC-RPCs. (A) The schematic representation of the binding sites of TCF/LEF transcription factors on the -5 kb promoter of the mouse *Sox2* genes (N-2 enhancer). (B) EMSA was carried out using the biotin-labeled wild-type as well as the mutated (underlined nucleotides) *Sox2* promoter probe. (C) TCF7 dose-dependently activated the *Sox2* promoter. (D) Luciferase assays with the *Sox2* promoter using WNT activators (WNT3A and LiC) as well as the WNT inhibitors (DKK1 and Quercetin). (E) Validation of the effect of *Sox2* RNAi in ESC-RPCs by western blot analysis. (F) Effects of sh*Sox2* on the gene expression in ESC-RPCs. Values in cells infected with the shControl are set at 1.0. (G) Immunofluorescence staining analysis of GFAP, MAP2 and OPSIN in sh*Sox2*- and shControl ESC-RPCs. DAPI is set as a grey color. Data are shown as mean  $\pm$  SD; ANOVA (C, D, F), *t* test (G); \*  $P < 0.05$ , \*\*  $P < 0.01$ . Scale bars: 100  $\mu$ m (G).

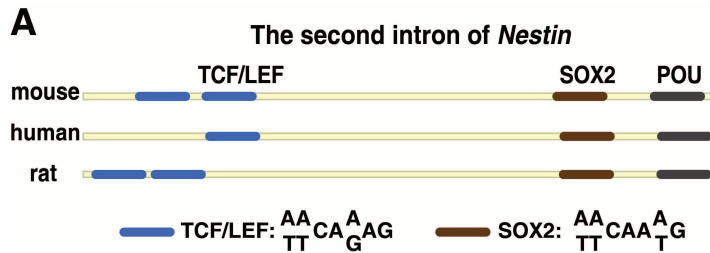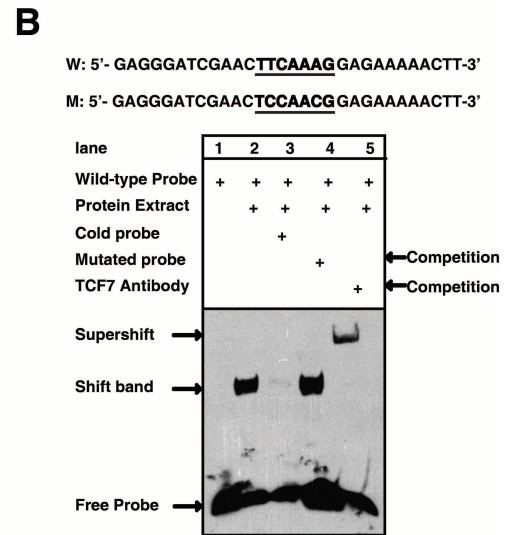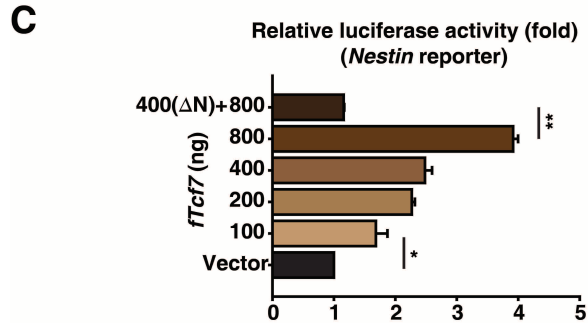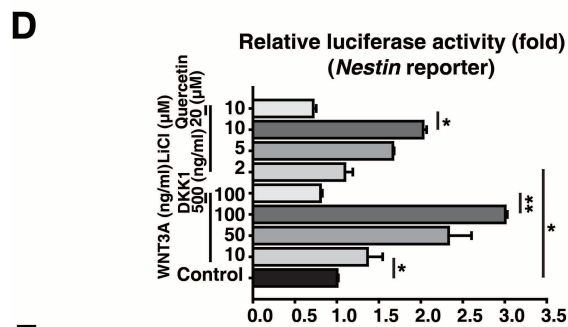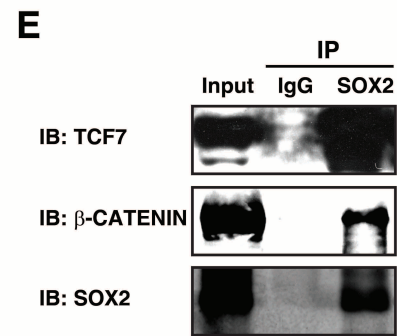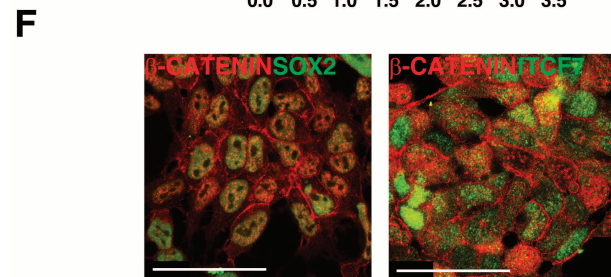

**Supplemental Figure 6**

The expression of *Nestin* is directly controlled by WNT/TCF7 signaling and TCF7, SOX2 and β-CATENIN form protein complexes in ESC-RPCs. (A) The schematic representation of an evolutionally conserved sequence in the *Nestin* gene promoters (2<sup>nd</sup> intron) containing SOX2 (brown boxes) and TCF/LEF binding sites (blue boxes). (B) EMSA was conducted using either the biotin-labeled wild-type *Nestin* probe or a mutated probe (underlined nucleotides). (C) TCF7 dose-dependently activated the *Nestin* promoter. (D) The *Nestin* promoter activity was activated by WNT activators (WNT3A and LiCl) and blocked by WNT inhibitors (DKK1 and Quercetin) as determined by luciferase assays conducted in HEK293 cells. (E) The representative result of coimmunoprecipitation assays among TCF7, SOX2 and β-CATENIN proteins conducted in HEK293 cells. (F) Colocalization of TCF7, SOX2 and β-CATENIN proteins is illustrated by confocal images of immunostaining. Data are shown as mean ± SD; ANOVA (C, D); \*  $P < 0.05$ , \*\*  $P < 0.01$ . Scale bars: 50 μm (F).



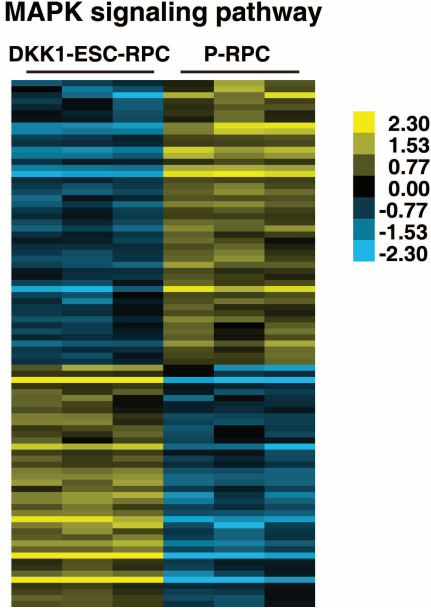

**Supplemental Figure 7**

The comparison of MAPK signaling gene expression patterns between DKK1 ESC-RPCs and P-RPCs ( $P < 0.05$ ; Fold Change  $> 2$ ).

## Supplemental methods

### ***ESC culture and differentiation into retinal progenitor cells (RPCs).***

*Sox1.EGFP* knock-in (46C) mouse ESCs from Austin Smith were cultured on mitomycin C (Sigma-Aldrich) treated mouse embryonic fibroblasts as described previously (1) and were used for the RPC induction experiments. ESCs were suspended in the serum free differentiation medium (2-4) for 3 days to form embryoid bodies (EBs) in the presence of SB431542, an inhibitor of activin receptor-like kinase family (ALK4, 5 and 7), to block Nodal signaling. Then, EBs were plated on Matrigel-coated culture dishes in the chemical defined medium (CDM). At day 7 of the differentiation, Sox1<sup>+</sup> neural progenitor cells (NPCs) (35.8%) were purified by fluorescence-activated cell sorting (FACS). The sorted cells were cultured in the N2 medium supplemented with 10  $\mu$ M DAPT (Calbiochem) and 20 ng/ml bFGF for further induction of retinal progenitor lineages until day 24.

In addition, three additional different mouse ESCs lines, namely D3 ESC line expressing EGFP constitutively (D3<sup>EGFP</sup>), ESCs carrying an *Oct4.EGFP* transgene (ESC<sup>Oct4.EGFP</sup>) (5), and an ESC line (kindly provided by Austin Smith) expressing EGFP under the control of the endogenous Sox1 locus and generated under 2i condition (2i-ESC<sup>Sox1.EGFP</sup>) (inhibitors of Fgf/Ras/Mek

signaling and GSK3), were used to generate ESC-RPCs through the SFEB/Matrigel method (6). ESCs were suspended in the serum free differentiation medium supplemented with 2% (v:v) Matrigel at D0. The medium was changed at D3. On day 7, the cell aggregates were digested in the papain system, sorted by FACS. Then the enriched neural lineage cells were replated in the N2 medium supplemented with 10  $\mu$ M DAPT and 20 ng/ml bFGF, cultured until day 14. The FACS enrichment strategy differed for the derivatives of the 3 ESC lines: EGFP<sup>+</sup> and PSA-NCAM<sup>+</sup> cells were collected for D3<sup>EGFP</sup> cell line; Oct4<sup>-</sup> and PSA-NCAM<sup>+</sup> were sorted for ESC<sup>Oct4.EGFP</sup> cell line; Sox1<sup>+</sup> and PSA-NCAM<sup>+</sup> cells were selected for 2i-ESC<sup>Sox1.EGFP</sup> cell line.

DKK1 treatment (100 ng/ml), overexpression of  $\Delta NTcf7$  and silencing total *Tcf7*, *Sox2* or *Nestin* in ESC-RPCs were performed 4 days before in vitro assay or subretinal transplantation.

***Dissociation of the retinal tissue.*** Retinal cells from P1 C57BL/6 mice with a constitutively expressed *EGFP* transgene were digested in the papain dissociation system (Roche). Then cells were suspended in GMEM supplemented with DNase (0.005%) and kept on ice prior to subretinal



transplantation, FCM analysis and collect in TRIzol for microarray analyses.

**Flow cytometric analysis.** For 46C ESCs, retina committed aggregates were cultured in the CDM until day 7. For retinal tumor tissues, they were separated and washed with HBSS carefully. Then the aggregates and tumor tissues were washed for 3 times, dissociated in the papain dissociation system (Roche), triturated mechanically with fire-narrowed Pasteur pipettes. After neutralization, the cells were resuspended in HBSS containing 0.1% of BSA, and filtrated through a cell strainer (BD Biosciences). To separate two distinct cell populations (EGFP<sup>+</sup> and EGFP<sup>-</sup>), cells were sorted using a FACS Aria cell sorter and FACS Diva software (BD Biosciences). Gates for each population were set so that two subsets sorted based on EGFP expression would not overlap when reanalyzed.

For flow cytometric analysis, cultured cells and neural retinae were dissociated by TrypLE (Life Technologies) and the papain dissociation system, respectively, into single cell suspension, then fixed by 4% paraformaldehyde and permeabilized by ice-cold Methanol. Before staining, the sample cells were washed in PBS containing 1% BSA and 0.03% NaN<sub>3</sub> (wash buffer) and then stained by the specific antibody. After the primary antibody was added, the cells were incubated on ice for 20 min, and washed twice with wash

buffer. Then the second antibody was added, the cells were incubated on ice for 20 min, and washed twice with wash buffer. Before analysis, samples were filtered through cell strainer caps (35  $\mu\text{m}$  mesh; BD Biosciences) and then performed on the BD Accuri C6 flow cytometer and the C6 software program (BD Biosciences).

***BrdU incorporation analysis.*** To examine the proliferation capacity of differentiated cells, ESC-RPCs were plated onto coverslips coated with poly-D-Lysine (Millipore), laminin (BD Biosciences) and fibronectin (BD Biosciences). 5-bromo-2'-deoxyuridine (BrdU, Sigma-Aldrich) was added at the final concentration of 10  $\mu\text{M}$ . Four hours later, cells were fixed for further immunostaining assay.

***Immunofluorescence staining and quantification.*** Immunostaining analyses were carried out for the detection of cell-specific markers and/or BrdU. Cells were seeded onto glass coverslips and fixed with 4% paraformaldehyde.

Mice were anesthetized and perfused intracardially with 0.1 M phosphate buffer saline (PBS) followed by 4% paraformaldehyde in PBS at 4  $^{\circ}\text{C}$ . Retinae were removed and embedded in optimum cutting temperature compound on

liquid nitrogen. Cryosections (10-20  $\mu\text{m}$ ) were cut on a cryostat (Leica). Then slides and sections were stained as described previously (7).

Primary antibodies used were as followings: Sox2 (Rabbit); Pax6 (Rabbit, Covance); Nestin (Mouse, Chemicon); Nrl (Rabbit, Chemicon); Vimentin (Rabbit, Biovision); BrdU (Rat, AbD Serotec); PCNA (Mouse, Sigma); Hes1 (Rabbit, Chemicon); Rax (Rabbit, Millipore); Otx2 (Rabbit, Chemicon); Sox1 (Rabbit, Abcam); Opsin (Mouse, Sigma-Aldrich); fTcf7 (Rabbit, Cell Signaling); Tcf7 (Rabbit, Cell Signaling). For secondary antibody staining, we used the corresponding Cy3 and FITC fluorescent-tagged antibodies (Jackson).

The population of BrdU<sup>+</sup>, PCNA<sup>+</sup>, Sox2<sup>+</sup>, Nestin<sup>+</sup> and fTcf7<sup>+</sup> cells among total differentiated cells (DAPI-labeled) was counted with an Image-Pro Plus software (Media Cybernetics). At least five fields of each coverslip were chosen randomly and three coverslips in each group were counted. Data were replicated at least three times and were expressed as mean  $\pm$  SD.

***Lentivirus preparation.*** The full length of *Tcf7* was cloned from total cDNA of the mouse kidney by standard molecular procedures, and subcloned into lentiviral vector pRRL by primers as followings: 5'-ATG CCG CAG CTG GAC TCG-3' and reverse: 5'-CTA GAG CAC TGT CAT CGG-3'. The  $\Delta NTcf7$



overexpression vector was generated using the pCDF1-MCS2 expression vector. The cDNA sequence encoding the  $\Delta NTcf7$  isoform, which lacks the amino-terminal  $\beta$ -catenin binding domain, was amplified by PCR using cDNAs of mouse ESCs as a template. Primers used for PCR are as followings:  $\Delta NTcf7$  forward: 5'-ATG TAC AAA GAG ACT GTC TAC T-3' and reverse: 5'-GAG CAC TGT CAT CGG AAG GAA C-3'.

Lentiviruses were collected and concentrated by spinning in a centrifuge at 1000 g for 5 min (keep viruses cold). Then supernatant was filtered through a 0.45  $\mu$ m filter. Different batches of viruses were collected and spun in refrigerated ultracentrifuge (Hitachi, CP80MX) at 100,000 g for 2 hours. Pellets were resuspended in PBS containing BSA, followed by titer, aliquot and store at -80 °C.

***Lentivirus-mediated shRNA interference.*** Gene-specific regions of 21 bases for RNA interference were designed based on the RNAi Consortium protocol. Oligonucleotides were cloned into the pLKO.1 clone vector (10878, Addgene). All sequences were analyzed by BLAST search to minimize the off-target effect. The plasmid pLKO.1 - TRC was used as a control (10879, Addgene). The sequences used were as followings: sh*Tcf7*: 5' - TTC TCC ACT CTA CGA ACA TTT -3'; sh*Sox2*: 5' - AAG CTG AGA ATT TGC CAA TAT -

3'; sh*Nestin*: 5' - AGA AGA CCA GCA GGC GTT TAG -3'. Twenty-four hours after lentiviral particle infection, puromycin was used to select for cells that stably expressed the shRNA of interest. The efficiency of RNAi was validated by qPCR or western blot analysis at  $\geq 4$  days post infection.

***RNA sample preparation, RT-PCR and qRT-PCR analyses.*** Total RNA was extracted from cultures using TRIzol (Invitrogen) followed by chloroform extraction according to the manufacturer's protocol. For RT-PCR analysis, two  $\mu\text{g}$  of total RNA was reverse-transcribed using RevertAid<sup>TM</sup> M-MuLV RT kit (Fermentas) and Oligo d(T)<sub>18</sub> primers according to manufacturer's instructions. PCR performed on 1/20 of the final cDNA volume using the 2xTaq PCR master mix (Tiangen). Reactions were performed at 60 °C for 30 cycles.

Real-time qRT-PCR was performed with SYBR<sup>®</sup> Green qPCR Premix Ex Taq<sup>TM</sup> II with ROX (TaKaRa) according to manufacturer's instructions. Signals were detected on an ABI PRISM 7900 machine (Applied Biosystems). QRT-PCR was performed for various genes and results were normalized to *Gapdh* levels.

Sequences of primers used in this study are provided in Supplemental Table

5.

**Protein sample preparation and western blot analysis.** Samples were collected and lysed in ice-cold a radioimmune precipitation assay buffer (RIPA) supplemented with protease inhibitor phenylmethanesulfonyl fluoride (PMSF, Shenergy Bicolor Bioscience Technology Company) and cocktail (Sigma-Aldrich). After 30 min incubation on ice, extracts were clarified by centrifugation at 12000 g for 20 min at 4 °C and stored at -80 °C. Protein concentrations were determined by a protein assay kit (Bio-Rad). Western blot analysis was carried out as previously described (7). Specific signals were detected using fluorescence-conjugated secondary antibodies (LI-COR), and scanned by the Odyssey 9120 Infrared Imaging System (LI-COR).

**Luciferase assays.** Cells were seeded at a density of  $1.2 \times 10^5$  per well into 24-well plates 24 hours before transfection. To determine the endogenous activity, cells were transfected with reporter plasmids (250 ng) and vector pRL-TK (10 ng, Promega) as a control for the transfection efficiency using Lipofectamine 2000 (Invitrogen). Eighteen hours after transfection, cells were stimulated with the Wnt3a-containing medium for 6 hours. Then, cells were lysed and luciferase activities were evaluated with the Dual-Luciferase Assay

System (Promega) according to the manufacturer's recommendations.

**Chromatin immunoprecipitation (ChIP) assays.** The ChIP analysis was performed as described previously (7) with the anti-Tcf7 antibody. Immunoprecipitated DNA fragments were analyzed by PCR amplification using primers for *Sox2* and *Nestin* genes. Ten percent of the total genomic DNA from the nuclear extract was used as the input. The primers used are as followings: *Sox2* forward: GCA CGA CCG AAA CCC TTC TT, reverse: GCT GCC ATC TCC CTG TCC AA; *Nestin* forward: GAC ATT GAG GCT GAA GGA GC, reverse: TCG GTT TGT TTG GGG CAC TT; *DHFR* forward: CTG ATG TCC AGG AGG AGA AAG G, reverse: AGC CCG ACA ATG TCA AGG ACT G.

**Electrophoretic mobility shift assays (EMSAs).** Nuclear extracts isolated from HEK293 overexpressing *Tcf7* for 2 days were prepared and EMSAs were performed as described previously (8). In brief, oligonucleotide probes were synthesized and labeled with biotin at the 3' end of the forward oligonucleotide. For the competitive assay, an additional 200-fold molar excess of the unlabeled probe was added. For the super-shift analysis, Tcf7 antibody (2  $\mu$ l per reaction) was added.

## Supplemental references

1. Ying QL, Stavridis M, Griffiths D, Li M, and Smith A. Conversion of embryonic stem cells into neuroectodermal precursors in adherent monoculture. *Nat Biotechnol.* 2003;21(2):183-6.
2. Ikeda H, Osakada F, Watanabe K, Mizuseki K, Haraguchi T, Miyoshi H, Kamiya D, Honda Y, Sasai N, Yoshimura N, et al. Generation of Rx+/Pax6+ neural retinal precursors from embryonic stem cells. *Proc Natl Acad Sci U S A.* 2005;102(32):11331-6.
3. Hirami Y, Osakada F, Takahashi K, Okita K, Yamanaka S, Ikeda H, Yoshimura N, and Takahashi M. Generation of retinal cells from mouse and human induced pluripotent stem cells. *Neuroscience letters.* 2009;458(3):126-31.
4. Kuwabara T, Hsieh J, Muotri A, Yeo G, Warashina M, Lie DC, Moore L, Nakashima K, Asashima M, and Gage FH. Wnt-mediated activation of NeuroD1 and retro-elements during adult neurogenesis. *Nature Neuroscience.* 2009;12(9):1097-U6.
5. Yang H, Shi L, Wang BA, Liang D, Zhong C, Liu W, Nie Y, Liu J, Zhao J, Gao X, et al. Generation of genetically modified mice by oocyte injection of androgenetic haploid embryonic stem cells. *Cell.* 2012;149(3):605-17.
6. Eiraku M, Takata N, Ishibashi H, Kawada M, Sakakura E, Okuda S, Sekiguchi K, Adachi T, and Sasai Y. Self-organizing optic-cup morphogenesis in three-dimensional culture. *Nature.* 2011;472(7341):51-6.
7. Li L, Sun L, Gao F, Jiang J, Yang Y, Li C, Gu J, Wei Z, Yang A, Lu R, et al. Stk40 links the pluripotency factor Oct4 to the Erk/MAPK pathway and controls extraembryonic endoderm differentiation. *Proc Natl Acad Sci U S A.* 2010;107(4):1402-7.
8. Li X, Zhu L, Yang A, Lin J, Tang F, Jin S, Wei Z, Li J, and Jin Y. Calcineurin-NFAT signaling critically regulates early lineage specification in mouse embryonic stem cells and embryos. *Cell stem cell.* 2011;8(1):46-58.



**Supplemental Table 1**

## mouse RT-PCR primer

*Pax6* ACCTCCTCACTCGTGCC  
CCTGAATACCCAAGTCTGCT  
*Rax* CGGCATCCTAGACACCTTTCC  
ACTTAGCCCGTCCGTTCTG  
*Hes1* TCTACACCAGCAACAGTGG  
TCAAACATCTTTGGCATCAC  
*Isl1* GTGCGGACTGTGCTCAAC  
AGCCTGGTCTCCTTCTG  
*Calb* TGCCAGCAACTGAAATCC  
CTTCCCTCCATCCGACAA  
*Chx10* TGGTCCACGGTGTAACT  
GAGGGCTCACCAGCAGTA  
*Otx2* CCAAATCTACCCACCAAG  
TTCTGACCTCCATTCTGC  
*Crx* GGGCACAAGTATGAAGT  
GCTGGTAGTCTTGGGTTCT  
*Nrl* ATGGCTCAGTGCCTTG  
TGGTTGGGTTGGGTAG  
*Gapdh* GGCAAGTTCACGGCACA  
CGCCAGTAGACTCCACGACA

## mouse QRT-PCR primer

*APC* GCCAGGACATGGAGAAGCGTGC  
CCACACGTGTAGCTGGACTCTGAC  
*Ctnnb1* AGATGTGGACACTCCCAAG  
GCTGGTGAACCATAACAGCA  
*Gsk3b* CCACAGAACTCTTGTGGA  
CCAACTGATCCACACCCTG  
*Myc* CCCATTGCAGCGGGCAGACA  
CATCGTCGTGGCTGTCGGGG  
*Wnt2b* GTCGCACGGCTGTTCCGAGATT  
GACGCGCCTGCGGTACCTA  
*Wnt3a* TGAAGCAGGCTCTGGGCAGC  
GCTGACTCCCGGGTGGCTTT  
*Sox2* CCTTCTCCAGTTCGAGTCC  
CCCCGTGGTTACCTCTTCC  
*Nestin* CCCTCCATGTCGCTGGTCT  
GTCAGTTCGCCGCTACTCC  
*Vim* GCCGAGGACATCATCGCGCT  
GCTCCTGGATCTTTCATCGTGC  
*Pax6* GGCTTACTCCCTCCGATTGC  
CAGCTTGGTGGTGTCTTTGTCA  
*Sox1* AAGATGCACAACCTCGGAGATCAG  
TGTAATCCGGGTGTTCTTCAT  
*Otx2* AGACAGTGGGGAGATGGACG  
CAGCAGAATGGAGGTGAGAACA  
*Rax* AGTTGCTGCGAGCCCTGTG  
AGGTGAATTTCCGTTTGG  
*Hes1* GCGTGTGGGAAATACCG  
GGTCATGGCGTTGATCTGG  
*Crx* CCAGCGGAATCACTCTTT  
GCTGAGGGTAGGAAACAC  
*Chx10* GACGGCCAGTCCGATTCCG  
CCCAGGCGTAGACATCTGGGT  
*Nrl* CCACTACCACAACCGAAACCC  
GCTTCTGCTCTGCCAACG  
*Cralbp* AGAGGGGGTGGGCACATTCCG  
TCCCTCACCGCCTCATCCCG  
*GS* ATCGTGGAGGCTCACTACCG  
CCCAAAGTCTTGCATACCC  
*Tuj1* GCTCGTCCACTCTTATAGA  
CGGCTTCGCCCACTTAC  
*GFAP* CAGCTTACGGCCAACAGT  
TCCAGCGATTCAACCTTT  
*Gapdh* GGCAAGTTCACGGCACA  
CGCCAGTAGACTCCACGACA  
*Dvl* TGCAGTAACCTCGCATCCCTGAA  
GATGGCTGCTCCGTGTGGACC  
*Axin1* GAGGGAGCCCGTCAACCCCT  
TGGCATTGGTAAGTGCGAGGA  
*Axin2* AGCGCCAACGACAGCGAGTT  
CAGGGCGTGGTCTCGGAAA  
*Lef1* TTCAGGCAACCCATCCCA  
TCTTCCGTGCTAGTTCATAG  
*Tcf7* AGGCGAGGAACAGGACGATA  
TTCTCCATGTAAGTGGACGC  
*Tcf7l1* GCTGGGCTTGGAGGCAAGGG  
GGCGGAACCTCCGGACCTT  
*Tcf7l2* ACCCGGCAAACCTGAACTGT  
ACAGGAGGCGAAACATCGCACT  
*Ccnd2* CGCTCTGTGCGCTACCGACTT  
AGGGGTGGTGGCTTGGTCCG  
*Oct4* CATTGTTGTCGGCTTCTCTCC  
GCTCACCTGGGCGTTCT  
*Nanog* ACCTTCGGAAGAGCAGTC  
GAGGCAAAAGATAAGTGGG  
*Rex1* TCCTCAGTCTGGGGCTAAT  
GAAGAAAACGGCAAAGCAAGT

| Gene Symbol | ESC-RPC/P-RPC Fold Change | Gene Symbol | ESC-RPC/P-RPC Fold Change | Gene Symbol | ESC-RPC/P-RPC Fold Change |
|-------------|---------------------------|-------------|---------------------------|-------------|---------------------------|
| Fzd5        | 0.111907528               | Myc         | 2.513568809               | Sfrp1       | 5.294090197               |
| Frat2       | 0.141845346               | Mapk8       | 2.565460726               | Fzd9        | 5.714392001               |
| Camk2d      | 0.277011519               | Mapk10      | 2.592324797               | Fzd1        | 6.037078196               |
| Ccnd1       | 0.312599136               | Wnt7b       | 2.612647383               | Wnt5a       | 6.03936811                |
| Trp53       | 0.337103401               | Nfat5       | 2.675575978               | Sox17       | 15.64775313               |
| Rock1       | 0.361971387               | Nkd1        | 2.76926771                | Ccnd2       | 22.83675928               |
| Btrc        | 0.439038591               | Vangl2      | 2.80753009                |             |                           |
| Ppp3ca      | 0.443690545               | Sfrp2       | 2.865270124               |             |                           |
| Zranb1      | 0.475374641               | Tcf7l1      | 2.933009748               |             |                           |
| Prkx        | 0.483443698               | Daam1       | 2.94821772                |             |                           |
| Senp2       | 0.485741315               | Plcb3       | 2.955015455               |             |                           |
| Ppp3cc      | 0.499634634               | Tcf7l2      | 3.017497463               |             |                           |
| Tcf7        | 2.217178                  | Axin2       | 3.23156096                |             |                           |
| Tbl1xr1     | 2.140452271               | Fzd7        | 3.51521587                |             |                           |
| Daam2       | 2.383522378               | Fzd10       | 5.176786312               |             |                           |

**Supplemental Table 2**

Gene expression fold change in WNT signaling pathway between ESC-RPC and P-RPC.

| Donor cells                           | Tumor |        | Integration |        | Failure |        |
|---------------------------------------|-------|--------|-------------|--------|---------|--------|
| ESC <sup>Oct4.EGFP</sup> -RPC         | 11/16 | 68.75% | 5/16        | 31.25% | 0/16    | 0.00%  |
| DKK1-ESC <sup>Oct4.EGFP</sup> -RPC    | 0/16  | 0.00%  | 14/16       | 87.50% | 2/16    | 12.50% |
| 2i-ESC <sup>Sox1.EGFP</sup> -RPC      | 9/16  | 56.25% | 6/16        | 37.50% | 1/16    | 6.25%  |
| DKK1-2i-ESC <sup>Sox1.EGFP</sup> -RPC | 1/16  | 6.25%  | 14/16       | 87.50% | 1/16    | 6.25%  |
| D3 <sup>EGFP</sup> -RPC               | 13/20 | 65.00% | 7/20        | 35.00% | 0/20    | 0.00%  |
| DKK1-D3 <sup>EGFP</sup> -RPC          | 1/20  | 5.00%  | 18/20       | 90.00% | 1/20    | 5.00%  |

### Supplemental Table 3

Summary of transplantation results of six groups of donor cells used in this study. Failure is defined by the absence of EGFP<sup>+</sup> donor cells in injected eyes.

| Subretinal injection                          | Tumor |        |
|-----------------------------------------------|-------|--------|
| <i>fTcf7</i> with recombination WNT3A protein | 18/20 | 90.00% |
| <i>EGFP</i> with recombination WNT3A protein  | 0/10  | 0.00%  |
| Sham control                                  | 0/10  | 0.00%  |

**Supplemental Table 4**

Summary of the tumorigenicity potential of postnatal 1 day mouse retinae 3 weeks after *fTcf7* overexpression with recombination WNT3A protein. The *EGFP* with recombination WNT3A protein and sham injection are taken as control.

| Gene Symbol | DKK1-ESC-RPC/P-RPC Fold Change | Gene Symbol | DKK1-ESC-RPC/P-RPC Fold Change | Gene Symbol | DKK1-ESC-RPC/P-RPC Fold Change |
|-------------|--------------------------------|-------------|--------------------------------|-------------|--------------------------------|
| Ddit3       | 0.230605049                    | Egf         | 0.480359297                    | Mras        | 0.484947                       |
| Fos         | 0.082159587                    | Egfr        | 2.885270326                    | Myc         | 2.148288303                    |
| Fasl        | 4.757526137                    | Fgf1        | 6.904013056                    | Mef2c       | 3.958889882                    |
| Taok1       | 2.011582757                    | Fgf14       | 0.382073336                    | Ntrk2       | 9.612437437                    |
| Traf6       | 0.385771154                    | Fgf17       | 2.702886204                    | Pak1        | 2.220838019                    |
| Atf4        | 0.41525902                     | Fgf4        | 79.82052108                    | Pla2g1b     | 40.92786126                    |
| Relb        | 0.362198363                    | Fgf9        | 0.092042213                    | Pla2g2c     | 0.326410486                    |
| Bdnf        | 0.212044033                    | Fgfr1       | 3.368666498                    | Pla2g4b     | 0.436448133                    |
| Cacna1d     | 0.24389002                     | Fgfr2       | 5.726276392                    | Jmjd7       | 0.192175489                    |
| Cacna1h     | 0.146651192                    | Fgfr3       | 6.381449915                    | Pla2g10     | 2.989651808                    |
| Cacna2d1    | 0.104835426                    | Gadd45a     | 0.413086464                    | Pdgfra      | 2.864819732                    |
| Cacna2d3    | 3.637411626                    | Gng12       | 2.289720993                    | Pdgfrb      | 5.129423635                    |
| Cacnb4      | 2.287121803                    | Hspb1       | 3.753745991                    | Prkx        | 0.474288893                    |
| Cacng2      | 0.407078932                    | Hspa1b      | 0.296285594                    | Ppm1a       | 0.405585856                    |
| Cacng3      | 0.139959319                    | Hspa1a      | 0.331589083                    | Ppp3ca      | 0.440012954                    |
| Cacng5      | 0.446118488                    | Hspa2       | 0.243017096                    | Ppp5c       | 0.459987761                    |
| Cdc25b      | 0.461837527                    | Ikbkb       | 2.09783302                     | Rps6ka6     | 2.056199616                    |
| Dusp16      | 0.40333118                     | Mapk10      | 2.661179621                    | Kras        | 2.656298668                    |
| Dusp6       | 0.158333413                    | Mapk11      | 2.453295902                    | Trp53       | 0.372890307                    |
| Evi1        | 7.588610402                    | Mapk8       | 2.533603547                    | Tgfb2       | 0.414374663                    |
| Tgfb3       | 0.413993615                    | Tgfb2       | 5.636711631                    |             |                                |

**Supplemental Table 5**

Gene expression fold change in MAPK signaling pathway between DKK1-ESC-RPC and P-RPC.
